# Supplementary material for: Copper-binding ligands in deep-sea pore waters of the Pacific Ocean and potential impacts of polymetallic nodule mining on the copper cycle
Source: Springer Nature journal article supplement (doi:10.1038/s41598-021-97813-3), 2021-09-16

## Supplementary

### **Copper-binding ligands in deep-sea pore waters of the equatorial Pacific Ocean and potential impacts of polymetallic nodule mining on the copper cycle**

Sophie A. L. Paul<sup>1,2\*</sup>, Rebecca Zitoun<sup>3</sup>, Ann Noowong<sup>1</sup>, Mythili Manirajah<sup>1</sup>, Andrea Koschinsky<sup>1</sup>

<sup>1</sup> Department of Physics and Earth Sciences, Jacobs University Bremen, Campus Ring 1, 28759 Bremen, Germany

<sup>2</sup> GEOMAR Helmholtz Centre for Ocean Research Kiel, Wischhofstr. 1-3, 24148 Kiel, Germany

<sup>3</sup> Department of Ocean Systems (OCS), Utrecht University, Royal Netherlands Institute for Sea Research (NIOZ), 1797 SH, 't Horntje, The Netherlands

\*Corresponding author

#### **Supplementary 1 Rhizon testing**

Little information exists on the reliability (i.e. recovery, contamination) of rhizons for trace metal sampling (e.g., rare earths (Abbott et al., 2015)). However, the data that is available suggests that rhizons do not quantitatively sample metals from solution or that a significant blank is introduced. Therefore, we tested two new rhizons, cleaned with DI at the beginning of the experiment and cleaned with 0.1 M HCl suprapure between sampling and discarding ca. 1 mL sampled solution first, mimicking the procedure at sea. After each cleaning, a DI Blank was taken through the rhizons. With rhizon #1, we sampled a DI solution spiked with 79 nM Cu (prepared from a single element standard) and with rhizon #2 we sampled a 550 mM NaCl-DI solution (NaCl suprapure; Merck; approximately seawater salinity) spiked with 79 nM Cu. Blanks and both test sets were measured with ICP-MS (for details also see Material and methods – dCu analyses with ICP-MS). The concentration of 79 nM was chosen to reliably measure it with the ICP-MS at 80x dilution and not have issues with the detection limit. An aliquot of the Cu-spiked solutions was kept at the beginning of the experiment as a reference for the original solution. At the end, an aliquot from the final solution was kept again to account for possible wall adsorption throughout the time of the experiment or any other impacts on the Cu spiked solutions.

Results showed that blanks (0.5 M HNO<sub>3</sub>) were below the detection limit for Cu (0.4 nM, n=1 ICP-MS run) except the second rhizon #2 blank after HCl cleaning. Recovery of the original 79 nM solution at the end was 100-104% (Table S1). Recovery of the spiked DI solution was only 34-53%, while recovery of the NaCl-solution was 103% (Table S1). The quantitative NaCl recovery of 103% suggests that rhizons can indeed be used for pore-water Cu sampling in seawater.

Table S1: Results from rhizon testing incl. Blanks, 79 nM Cu spiked DI, and 79 nM Cu spiked NaCl-DI solution. LOD: limit of detection (0.4 nM).

| <b>Sample ID</b>                     | <b>[nM]</b> | <b>% Recovery</b> |
|--------------------------------------|-------------|-------------------|
| Blank rhizon #1 new DI clean         | < LOD       |                   |
| Blank rhizon #1 (reused) HCl clean   | < LOD       |                   |
| Blank rhizon #2 new DI clean         | < LOD       |                   |
| Blank rhizon #2 (reused) HCl clean   | 1.0         |                   |
| 79 nM Cu DI original beginning       | 79          |                   |
| 79 nM Cu DI rhizon #1 new DI clean   | 42          | 53                |
| 79 nM Cu DI rhizon #1 HCl clean      | 27          | 34                |
| 79 nM Cu DI original end             | 79          | 100               |
| 79 nM Cu NaCl original beginning     | 79          |                   |
| 79 nM Cu NaCl rhizon #2 new DI clean | 81          | 103               |
| 79 nM Cu NaCl rhizon #2 HCl clean    | 81          | 103               |
| 79 nM Cu NaCl original end           | 82          | 104               |

Reference:

Abbott, A.N., Haley, B.A., McManus, J. & Reimers, C.E., 2015. The sedimentary flux of dissolved rare earth elements to the ocean. *Geochimica et Cosmochimica Acta* 154: 186–200.

### Supplementary 2 Voltammetry parameters for CLE-AdCSV used in this study

Table S2: Voltammetry parameters for CLE-AdCSV used in this study (DP Mode). All voltammetric parameters were adapted from Sander et al. (2007).

| <b>Parameter categories</b> | <b>Setting parameter</b> | <b>Setting value</b> |
|-----------------------------|--------------------------|----------------------|
| N <sub>2</sub> gas          | Pressure (bar)           | 1.0 - 1.2            |
| Voltammetric setting        | Initial purge time (s)   | 120                  |
| Pre-treatment setting       | Deposition potential (V) | -0.0499              |
|                             | Deposition time (s)      | 60                   |
|                             | Equilibration time (s)   | 5                    |
| Sweep setting               | Start potential (V)      | -0.0499              |
|                             | End potential (V)        | -0.6                 |
|                             | Pulse amplitude (V)      | 0.07004              |
|                             | Pulse time (s)           | 0.025                |
|                             | Voltage step (V)         | 0.005035             |
|                             | Voltage step time (s)    | 0.3                  |
|                             | Sweep rate (V/s)         | 0.0168               |

Reference:

Sander, S. G., Koschinsky, A., Massoth, G., Stott, M. & Hunter, K. A., 2007. Organic complexation of copper in deep-sea hydrothermal vent systems. *Environmental Chemistry* 4: 81–89.

### Supplementary 3 Speciation table from ProMCC fitting

The resulting detection window of the method ( $D_{SA}$ ) was  $\sim 4.3 \log D_{SA}$ , calculated as the sum of the product of  $[SA]$  and  $K_{CuSA}^{cond}$  for  $CuSA$  and  $Cu(SA)_2$  (Apte et al., 1988; Laglera et al., 2015). Complexation capacities ( $\log \alpha_{CuL, Cu^{2+}}$ , with  $\alpha_{Cu^{2+}L}$  calculated as the product of  $[L']$  and  $K_{CuL, Cu^{2+}}^{cond}$ ;  $[L']$ : concentration of non-bound ligands by Cu; Gledhill and Gerringa, 2017) of the estimated Cu-binding ligands fell within one order of magnitude of  $D_{SA}$  indicating that Cu speciation parameters were reliably determined, except for SO242/2 219ROV-PUC28 – 10,11,12 cm.

#### References:

- Apte, S.C., Gardner, M.J. & Ravenscroft, J.E., 1988. An evaluation of voltammetric titration procedures for the determination of trace metal complexation in natural waters by use of computers simulation. *Analytica Chimica Acta*, 212: 1-21.
- Laglera, L.M. & Filella, M., 2015. The relevance of ligand exchange kinetics in the measurement of iron speciation by CLE–AdCSV in seawater. *Marine Chemistry*, 173: 100-113.
- Gledhill, M., & Gerringa, L. J. (2017). The effect of metal concentration on the parameters derived from complexometric titrations of trace elements in seawater—A model study. *Frontiers in Marine Science*, 4: 254.

Table S3: Side reaction coefficients and stability constants of each sample. Side reaction coefficients and stability constants of each samples were obtained with the van den Berg's ion-pairing model for seawater ([http://www.liv.ac.uk/%7Esn35/Documents/Useful\\_links\\_html](http://www.liv.ac.uk/%7Esn35/Documents/Useful_links_html); van den Berg, 2014) using sample specific [SA] and salinity values, as well as an ambient temperature of 21°C and a pH of 8.1. Salinity values measured in each sample in the lab were used. Parameters are given for the diluted samples.

| Sample ID             |                   | Salinity | aCu' | logK'CuSA   | logB'CuSA2 | aCuSA      | logaCuSA    | Cu nM | L1 [nM] | error [nM] | logK1 | Cu2+ (M)   | L'      | DSA  | logalpha |
|-----------------------|-------------------|----------|------|-------------|------------|------------|-------------|-------|---------|------------|-------|------------|---------|------|----------|
| SO242/2 146ROV-Niskin | bw                | 35       | 25   | 9.548694824 | 14.9616439 | 40575.1743 | 4.608260394 | 10.86 |         |            |       |            | -10.858 | 4.25 |          |
| SO242/2 146ROV-PUC28  | bw                | 35.7     | 25   | 9.54551276  | 14.9570858 | 40207.1034 | 4.604302787 | 8.88  | 68.40   | 24.00      | 11.97 | 1.60E-13   | 41.763  | 4.24 | 4.59     |
|                       | 2, 3, 4 cm        | 35       | 25   | 9.548694824 | 14.9616439 | 40575.1743 | 4.608260394 | 67.89 | 75.40   | 11.30      | 12.47 | 3.00E-12   | 7.513   | 4.25 | 4.35     |
|                       | 11, 12, 13 cm     | 34.9     | 25   | 9.549154592 | 14.9623025 | 40628.6421 | 4.608832308 | 93.32 |         |            |       |            | 74.683  | 4.25 | 5.18     |
| SO242/2 196ROV-PUC28  | bw                | 35.7     | 25   | 9.54551276  | 14.9570858 | 40207.1034 | 4.604302787 | 22.21 |         |            |       |            | -44.418 | 4.24 |          |
|                       | 3, 4, 5 cm        | 34.8     | 25   | 9.54961568  | 14.962963  | 40682.3362 | 4.609405885 | 27.98 |         |            |       |            | -41.428 | 4.25 |          |
|                       | 16, 17, 18 cm     | 35.3     | 25   | 9.547323359 | 14.9596794 | 40416.1127 | 4.60655454  | 50.94 | 121.00  | 29.00      | 12.04 | 6.70E-13   | 70.063  | 4.25 | 4.88     |
| SO242/2 219ROV-PUC28  | bw                | 35.5     | 25   | 9.546415509 | 14.958379  | 40311.1742 | 4.605425448 | 14.47 |         |            |       |            | -28.938 | 4.25 |          |
|                       | 2, 3, 4 cm        | 34.8     | 25   | 9.54961568  | 14.962963  | 40682.3362 | 4.609405885 | 96.24 | 88.00   | 13.60      | 12.19 | 6.59E-13   | -8.238  | 4.25 |          |
|                       | 10, 11, 12 cm     | 35.3     | 25   | 9.547323359 | 14.9596794 | 40416.1127 | 4.60655454  | 44.19 | 147.00  | 15.00      | 13.05 | 1.69E-13   | 102.813 | 4.25 | 6.06     |
| SO262 026MUC          | bw                | 31       | 24   | 9.568196173 | 14.9895783 | 42907.9833 | 4.632538103 | 1.0   |         |            |       |            | -0.951  | 4.27 |          |
|                       | 2, 5, 8 cm        | 32       | 24   | 9.563094508 | 14.9822705 | 42284.678  | 4.626183028 | 3.4   |         |            |       |            | -3.419  | 4.26 |          |
|                       | 12, 15, 18 cm     | 31.9     | 24   | 9.567730333 | 14.988911  | 42850.678  | 4.631957698 | 0.6   |         |            |       |            | -0.606  | 4.27 |          |
|                       | 21, 25, 27 cm     | 32.1     | 24   | 9.562593138 | 14.9815523 | 42223.9275 | 4.625558627 | 0.5   |         |            |       |            | -0.534  | 4.26 |          |
| SO262 063MUC          | bw                | 31.4     | 24   | 9.56613603  | 14.9866273 | 42655.1506 | 4.629971479 | 0.4   |         |            |       |            | -1.410  | 4.27 |          |
|                       | 1, 5.5, 8.5 cm    | 32.5     | 24   | 9.560603156 | 14.9787018 | 41983.688  | 4.623080586 | 9.6   | 31      | 5.3        | 12.0  | 3.9957E-13 | 21.671  | 4.26 | 4.38     |
|                       | 12, 15, 19 cm     | 32.1     | 24   | 9.562593138 | 14.9815523 | 42223.9275 | 4.625558627 | 0.9   |         |            |       |            | -0.905  | 4.26 |          |
|                       | 23, 27, 30 cm     | 32.3     | 24   | 9.561595067 | 14.9801227 | 42103.2594 | 4.624315718 | 1.1   |         |            |       |            | -1.136  | 4.26 |          |
| SO262 149MUC          | bw                | 32.4     | 24   | 9.561098346 | 14.9794111 | 42043.3377 | 4.623697186 | 7.3   |         |            |       |            | -3.622  | 4.26 |          |
|                       | 1.5, 4.5, 8.5 cm  | 31.8     | 24   | 9.564101966 | 14.9837136 | 42407.023  | 4.627437786 | 4.5   | 17      | 4.3        | 11.8  | 5.6788E-13 | 12.442  | 4.26 | 3.90     |
|                       | 12.5, 15, 17.5 cm | 32.3     | 24   | 9.561595067 | 14.9801227 | 42103.2594 | 4.624315718 | 0.6   |         |            |       |            | -0.557  | 4.26 |          |
|                       | 21, 25, 30 cm     | 31.2     | 24   | 9.5671628   | 14.9880981 | 42780.9695 | 4.631250622 | 0.7   |         |            |       |            | -0.680  | 4.27 |          |

| Sample ID        |               | Salinity | aCu' | logK'CuSA   | logB'CuSA2 | aCuSA      | logaCuSA    | Cu nM | L1 [nM] | error [nM] | logK1 | Cu2+ (M)   | L'     | DSA  | logalpha |
|------------------|---------------|----------|------|-------------|------------|------------|-------------|-------|---------|------------|-------|------------|--------|------|----------|
| SO268/1 005TVMUC | bw            | 33.5     | 25   | 9.555733421 | 14.9717263 | 41401.7096 | 4.617018275 | 0.6   |         |            |       |            | -0.604 | 4.25 |          |
|                  | 2, 6, 9 cm    | 35.9     | 25   | 9.544615054 | 14.9557999 | 40103.8884 | 4.603186483 | 3.9   | 20      | 5.6        | 11.8  | 4.0142E-13 | 16.298 | 4.24 | 3.99     |
|                  | 17, 20, 23 cm | 35.1     | 25   | 9.548236367 | 14.9609872 | 40521.9312 | 4.607690135 | 0.8   |         |            |       |            | -0.786 | 4.25 |          |
| SO268/2 184TVMUC | bw            | 35.4     | 25   | 9.546868793 | 14.9590283 | 40363.5342 | 4.605989186 | 0.7   |         |            |       |            | -0.677 | 4.25 |          |
|                  | 2, 5, 8 cm    | 35.3     | 25   | 9.547323359 | 14.9596794 | 40416.1127 | 4.60655454  | 3.4   |         |            |       |            | 69.371 | 4.25 | 4.09     |
|                  | 17, 20, 23 cm | 34.8     | 25   | 9.54961568  | 14.962963  | 40682.3362 | 4.609405885 | 1.4   |         |            |       |            | -1.420 | 4.25 |          |
| SO268/1 065MUC   | bw            | 35.3     | 25   | 9.547323359 | 14.9596794 | 40416.1127 | 4.60655454  | 1.7   |         |            |       |            | 18.973 | 4.25 | 4.19     |
|                  | 2, 5, 8 cm    | 35.3     | 25   | 9.547323359 | 14.9596794 | 40416.1127 | 4.60655454  | 2.6   |         |            |       |            | -2.555 | 4.25 |          |
|                  | 15, 18, 22 cm | 34.8     | 25   | 9.54961568  | 14.962963  | 40682.3362 | 4.609405885 | 0.3   |         |            |       |            | -0.601 | 4.25 |          |
| SO268/1 074MUC   | bw            | 35       | 25   | 9.548694824 | 14.9616439 | 40575.1743 | 4.608260394 | 1.2   |         |            |       |            | -1.182 | 4.25 |          |
|                  | 3, 5, 9 cm    | 35.3     | 25   | 9.547323359 | 14.9596794 | 40416.1127 | 4.60655454  | 5.8   | 5.0     | 0.9        | 12.7  | 3.2253E-11 | -0.779 | 4.25 |          |
|                  | 16, 19, 22 cm | 34.8     | 25   | 9.54961568  | 14.962963  | 40682.3362 | 4.609405885 | 0.5   |         |            |       |            | -0.483 | 4.25 |          |
| SO268/1 079MUC   | bw            | 34.2     | 25   | 9.552410341 | 14.9669662 | 41009.3446 | 4.612882828 | 2.1   | 5.4     | 1.3        | 12.4  | 2.46E-13   | 3.335  | 4.25 | 3.93     |
|                  | 3, 6, 9 cm    | 35.1     | 25   | 9.548236367 | 14.9609872 | 40521.9312 | 4.607690135 | 1.7   | 7.8     | 2.2        | 12.1  | 2.0308E-13 | 6.100  | 4.25 | 3.92     |
|                  | 17, 20, 23 cm | 34.2     | 25   | 9.552410341 | 14.9669662 | 41009.3446 | 4.612882828 | 0.6   |         |            |       |            | -0.509 | 4.25 |          |

## Supplementary 4 “Bad” and “good” fits of titration curves

1. Upper set of four graphs: Initial ProMCC graphs (without taking points out)
2. Lower set of four graphs: ProMCC graphs with taking points out
3. For each set of four: Graph on the upper left – titration curve, graph on the upper right – Langmuir fit, graph on the lower left – Ruzic and van den Berg fit, graph on the lower right – Scatchard fit

### Bad fit examples

Sample SO268\_184MUC 2,8,5 cm – not enough titration points

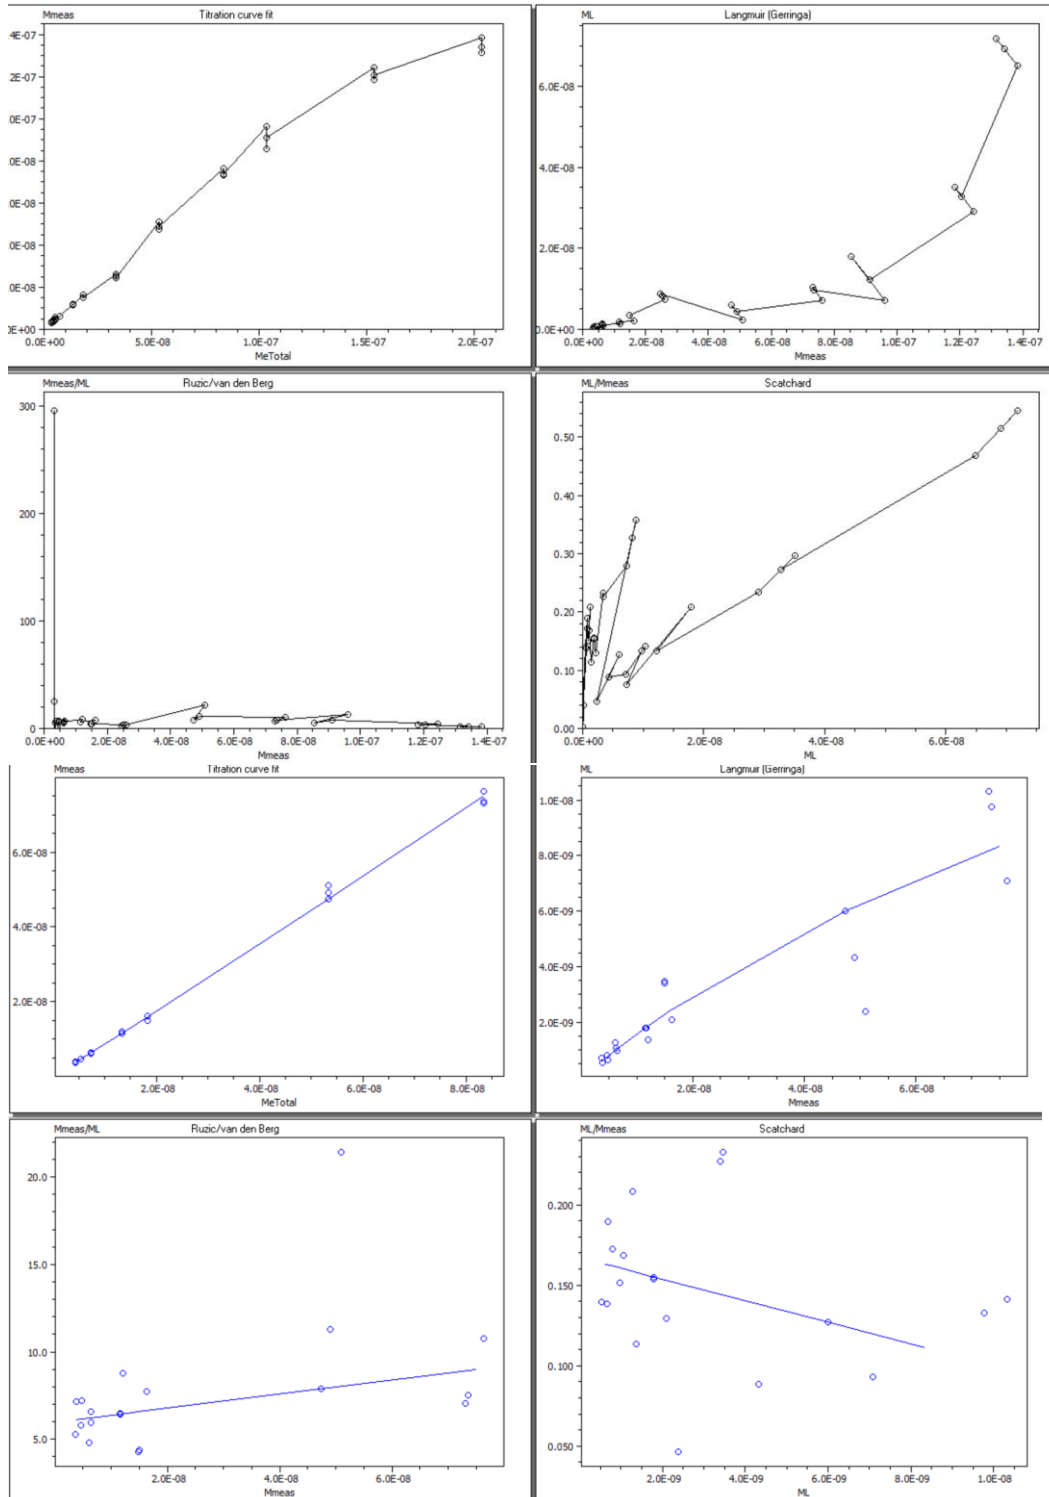

Sample SO242\_146ROV28\_11-13 cm – bad titration curve

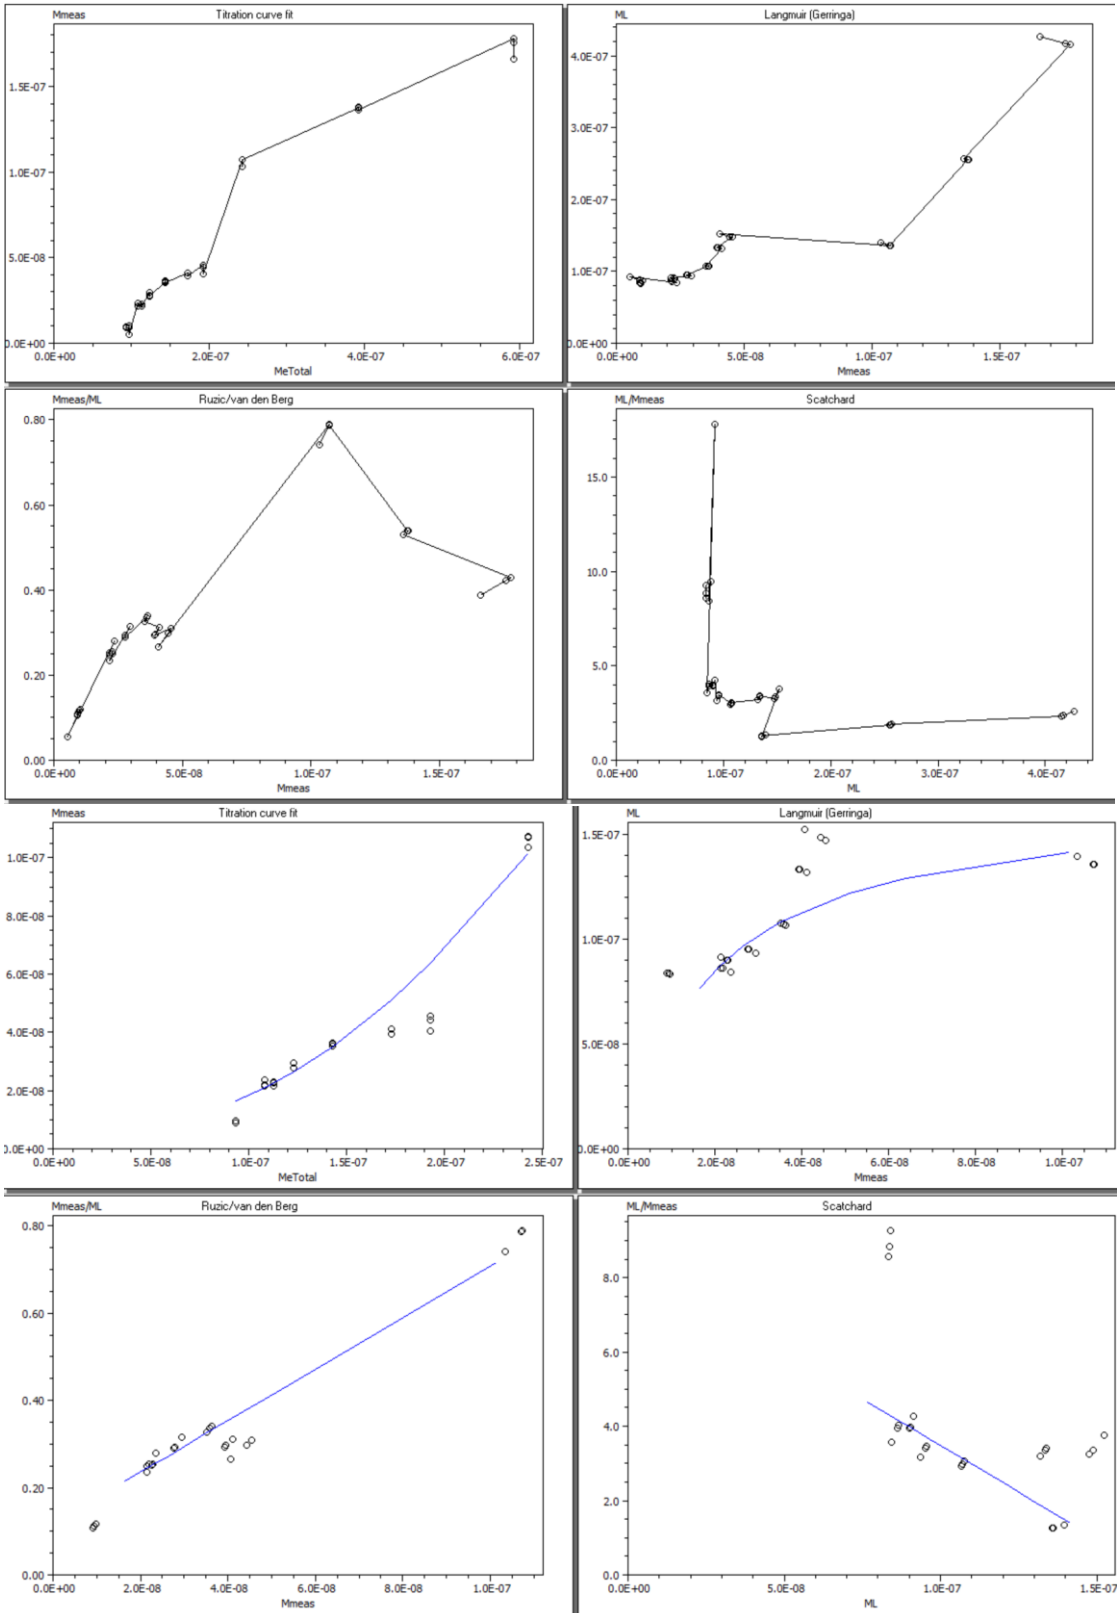

# Good fit examples

Sample SO242\_196ROVPC28\_16-18cm

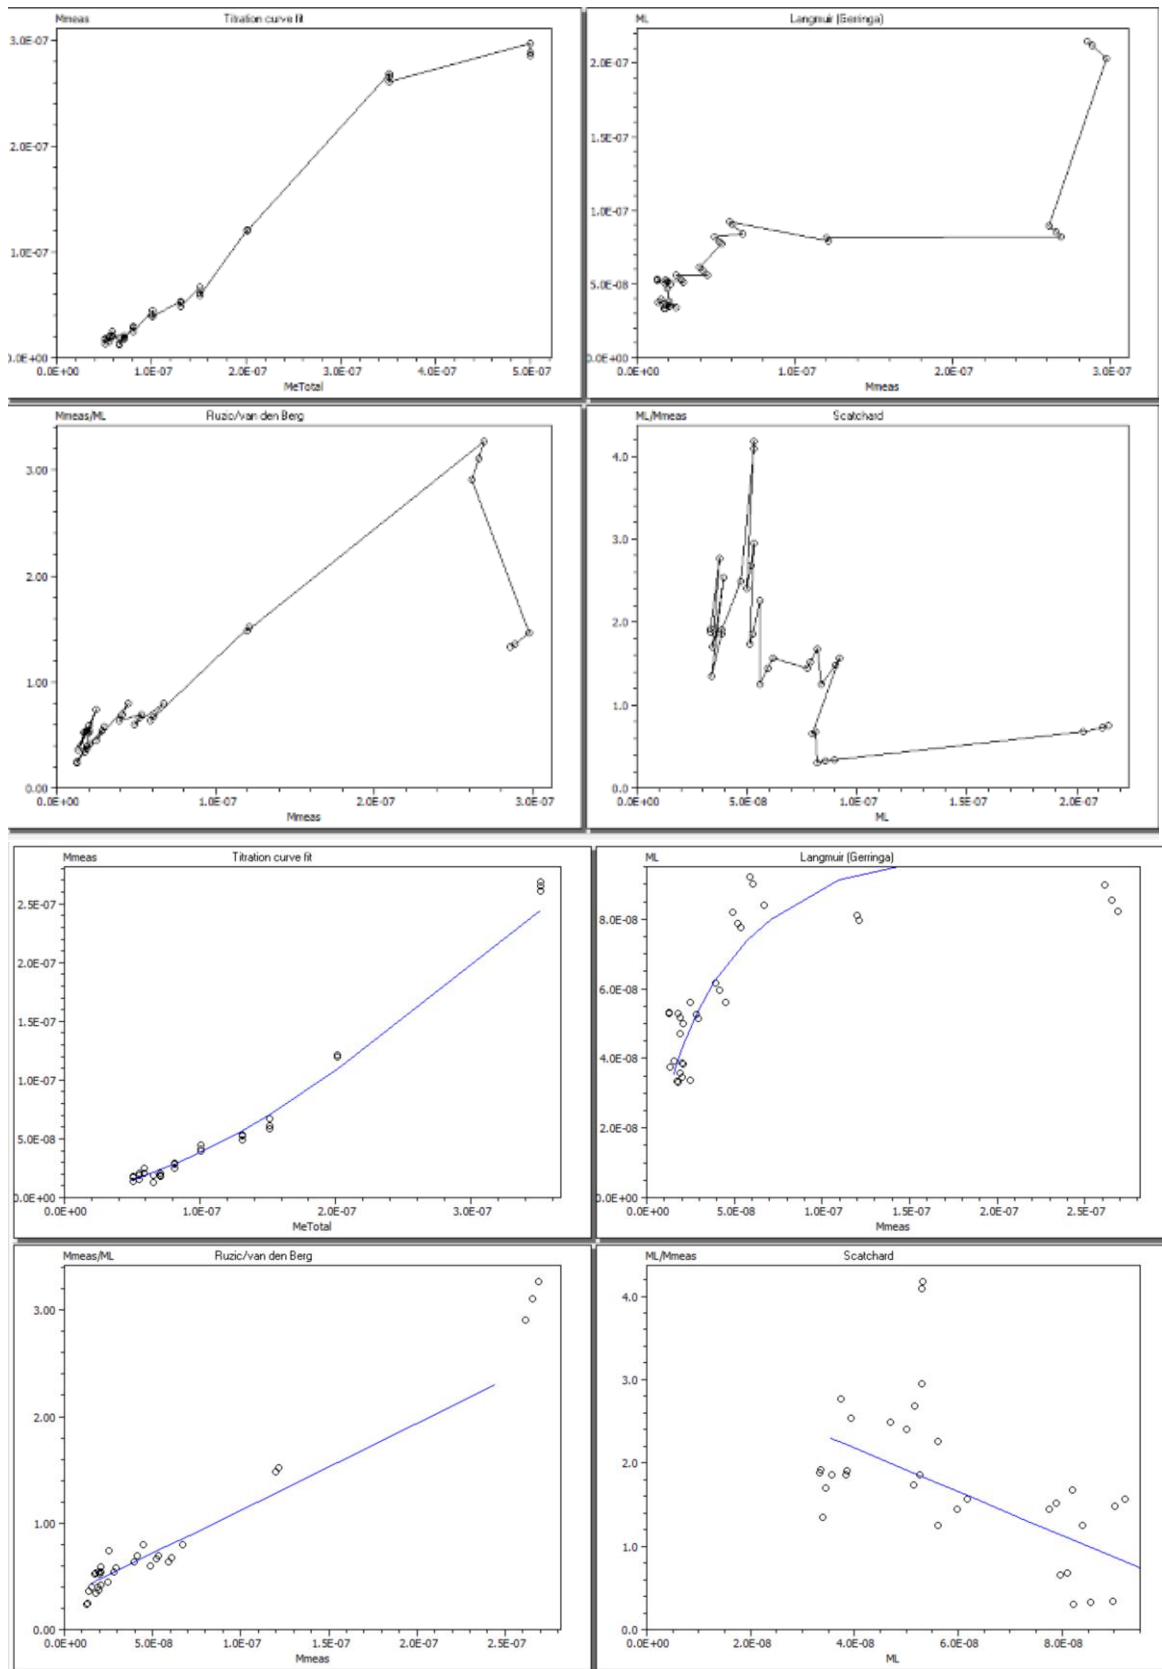



Sample SO242\_146ROVPC28\_BW

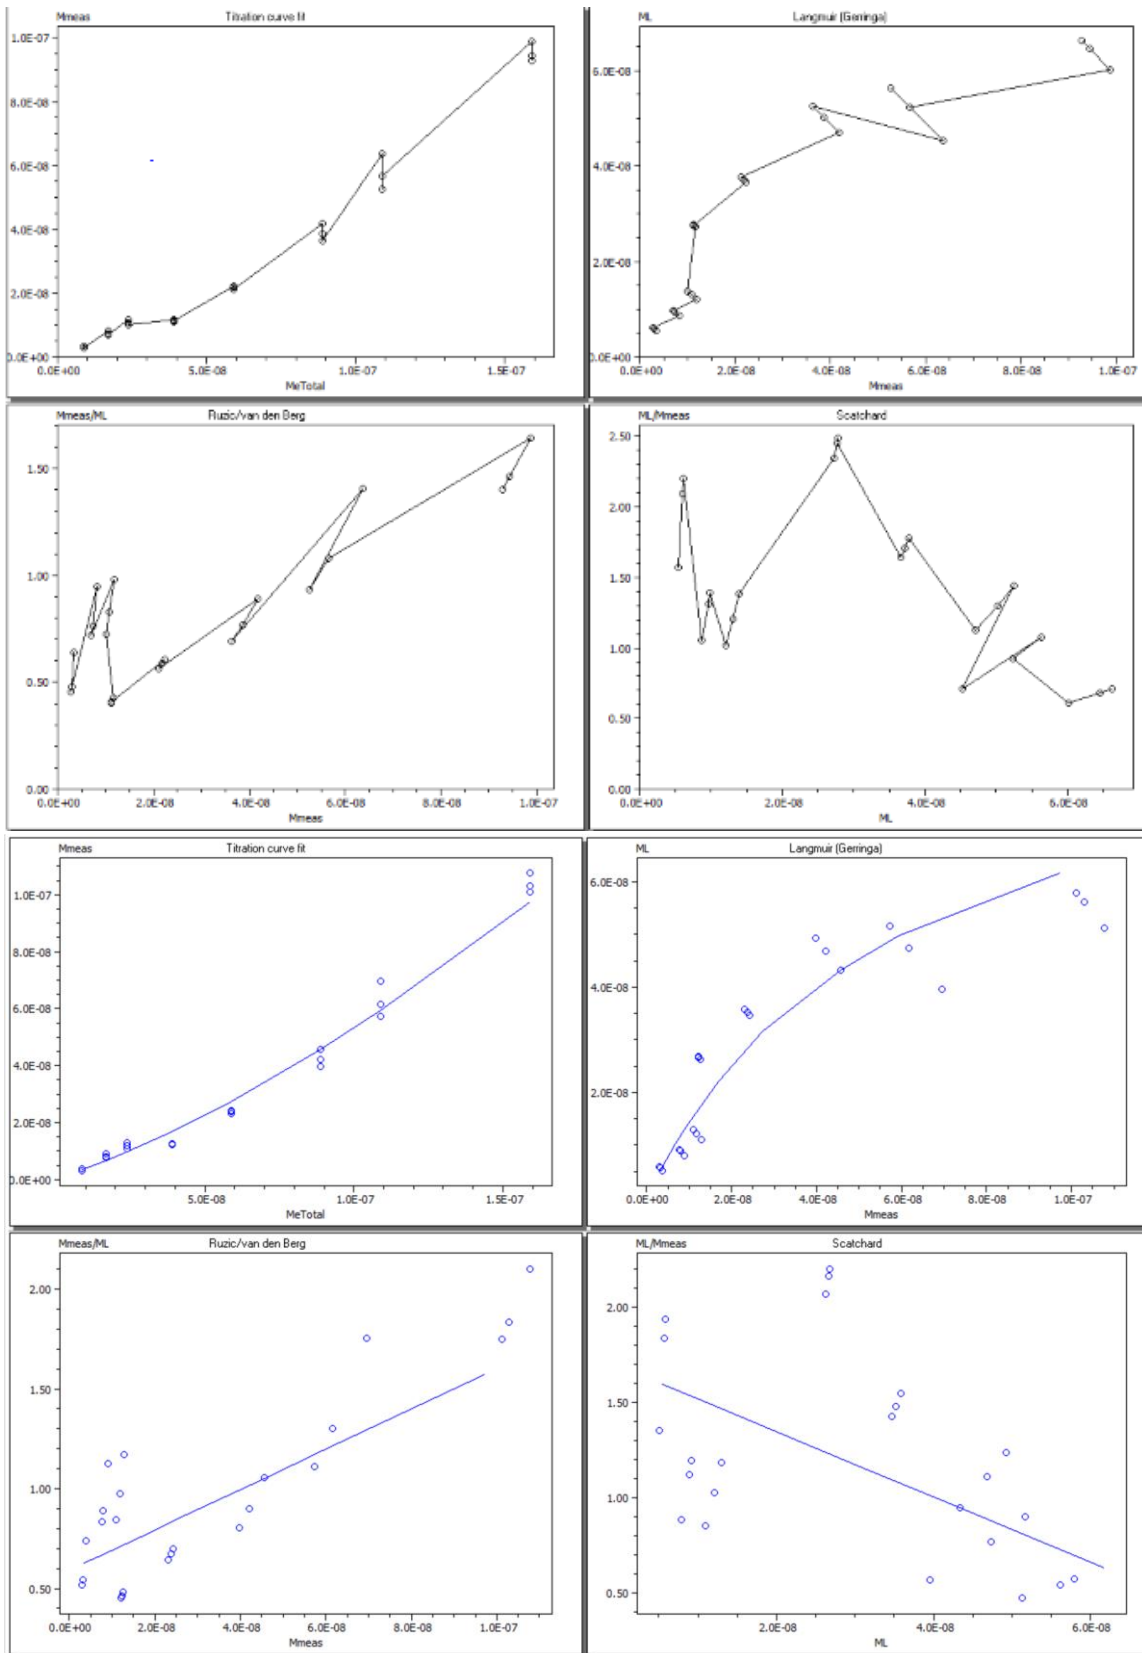

Supplement: MOESM1 [file 41598_2021_97813_MOESM1_ESM.pdf]
